**Title:** NICARDIPINE BUT NOT ENALAPRIL PREVENTS RENAL HEMODYNAMIC ALTERATION DURING INFRARENAL AORTIC CROSS-CLAMPING

**Authors:** P Colson, MD, JPh Gouin, MD, Ch Marty-Ane MD, H Mary, MD, Roquefeuil B, MD.

**Affiliation:** Dept. of Anesthesiology "B", Hopital St-Eloi, CHU Montpellier, 34059 Montpellier, France.

Infrarenal aortic cross-clamping during abdominal aortic surgery induces renal vasoconstriction, decreases Effective Renal Plasma Flow (ERPF) and Glomerular Filtration Rate (GFR) (1). Treatments with preoperative Enalapril (E), a converting enzyme inhibitor, or peroperative Nicardipine (N), a calcium antagonist, have been tested to assess renin-angiotensin system or calcium channel involvement during infrarenal aortic surgery.

After institutional approval and informed consent, 24 patients (40 to 73-yrs-old) were randomly divided into 3 groups: control (n=8), enalapril (n=8), nicardipine (n=8). E group received E (20mg/bid, PO), 2 days before surgery and placebo during surgery. N group received preoperative placebo and N (2mg bolus, then 2 mg/h) at the time of incision. C group received pre- and peroperative placebos. Anesthesia consisted of flunitrazepam, fentanyl, pancuronium and droperidol in the 3 groups. Sytemic (Swan Ganz and radial artery catheters) and renal (ERPF and GFR as assessed by Hippuran-1131 and DTPA-Tech99 clearances) hemodynamics were periodically recorded: 1- before aortic clamping (preclamp), 2- during aortic clamping

| (perclamp), 3- after aortic declamping (postclamp). |   |            |             |            |
|-----------------------------------------------------|---|------------|-------------|------------|
|                                                     |   | Preclamp   | Perclamp    | Postclamp  |
| HR<br>b/min                                         | C | 69.0±5.1   | 60.4±3.7    | 61.1±4.3   |
|                                                     | E | 80.0±5.4   | 66.3±4.0    | 75.1±3.5   |
|                                                     | N | * 85.9±2.4 | 75.5±6.2    | * 83.5±7.0 |
| BP<br>mmHg                                          | C | 85.4±4.1   | 84.4±3.4    | 84.9±5.0   |
|                                                     | E | 82.3±1.7   | 84.1±2.8    | 87.5±3.4   |
|                                                     | N | 89.9±2.4   | 86.4±3.7    | 83.9±3.1   |
| PCWP<br>mmHg                                        | C | 11.6±1.6   | 10.1±1.3    | 9.4±1.5    |
|                                                     | E | 14.0±1.0   | 12.0±1.1    | 13.0±1.5   |
|                                                     | N | 13.3±1.4   | 13.2±1.6    | 12.2±2.0   |
| CO<br>l/min/m                                       | C | 7.6±0.7    | 5.1±0.4     | 5.6±0.4    |
|                                                     | E | 6.5±0.9    | 5.2±0.4     | 6.0±0.4    |
|                                                     | N | 8.2±0.6    | 4.5±0.3     | 6.8±0.5    |
| ERPF<br>ml/min                                      | C | 227.3±62.4 | 185.4±44.7  | 317.5±61.0 |
|                                                     | E | 433.0±193  | 268.5±61.8  | 352.5±51.8 |
|                                                     | N | 336.2±90.4 | 352.4±65.2  | 260.4±43.4 |
| GFR<br>ml/min                                       | C | 71.4±20.3  | 40.8±8.5    | 59.6±9.0   |
|                                                     | E | 74.4±15.3  | 49.1±10.7   | 64.0±7.4   |
|                                                     | N | 63.2±11.0  | * 78.9±14.3 | 71.6±10    |
| m±sem, * p<0.05 between groups                      |   |            |             |            |

m±sem, \* p<0.05 between groups

Thus, renin-angiotensin seems to be not involved in renal function alteration during infrarenal aortic cross clamping. The beneficial effect of low doses of N might be accounted for by the abolition of renal autoregulation (2), which appears to be impaired during aortic cross-clamping.

References: 1) Anesthesiology 61:394, 1984.  
2) Circ Res 59:483, 1986.

**TITLE:** BOLUS DOSES OF ESMOLOL FOR THE PREVENTION OF PERIO-OPERATIVE HYPERTENSION AND TACHYCARDIA IN CARDIOVASCULAR SURGERY PATIENTS.

**AUTHORS:** P.C. Duke, MD, P. Goertzen, MD, B. Muirhead, MD, R. Greengrass, MD, D. Paetkau, MD.

**AFFILIATION:** Department of Anesthesia, University of Manitoba, Health Sciences Centre, CANADA.

**Introduction** Endotracheal intubation frequently results in marked elevation in heart rate (HR) and/or blood pressure. The objective is to demonstrate the effectiveness of bolus doses of esmolol (E), a short acting  $\beta$ -selective blocking agent, to prevent intubation induced elevations in HR and mean arterial pressure (MAP) in patients undergoing peripheral vascular (PV) procedures who are at risk to develop myocardial ischemia.

**Methods** With Ethics Committee approval, 27 PV (ASA II, III) patients were studied in a double blind manner and were randomly divided into 3 groups: placebo (P), esmolol 100 mg (E-100) or esmolol 200 mg (E-200) by bolus, 90 seconds prior to induction with thiopental. HR and direct MAP were observed at baseline and post-induction (PI) at 0.5, 1.5, 2.5, 3.5, 4.5 and 5.5 minutes. ECG leads II and V<sub>5</sub> (Monitor) and Holter leads II and CB<sub>5</sub> were used to monitor for myocardial ischemia.

Analysis of covariance was utilized to determine significance difference between the 3 groups.

**Results** Mean HR's PI were lower (p<.01) in each of the E groups compared to P. The PI HR was 44% above baseline in the P group, 9% below baseline in the E-100 group (p<.01 vs P), and 3% below baseline in the E-200 group (p<.01 vs P). Mean HR's were consistently lower in the E groups than in the P group for up to 4.5 minutes PI. No significant differences were detected between the esmolol groups. Ischemia was detected in 6 patients: P=3, E-100=1 and E-200=2.

**Conclusion** In PV patients, bolus doses of 100 or 200 mg of E, 90 seconds prior to intubation, effectively blunts maximum HR responses to intubation. Mean PI MAP(s) were significantly lower after E compared to P. No difference was detected in the incidence of hypotension, bradycardia, arrhythmias, or ischemia.

| HEART RATE              | PIAC | E100  | E200  |
|-------------------------|------|-------|-------|
| Baseline                | 77   | 78    | 77    |
| Post-induction          | 83   | 73    | 75    |
| Post-intubation maximum | 111  | 86 ** | 88 ** |
| 0.5 min post-intubation | 108  | 81 ** | 80 ** |
| 1.5 min post-intubation | 101  | 76 ** | 82 ** |
| 2.5 min post-intubation | 96   | 77 ** | 80 ** |
| 3.5 min post-intubation | 93   | 79 *  | 76 ** |
| 4.5 min post-intubation | 88   | 78    | 72 *  |
| 5.5 min post-intubation | 83   | 78    | 73    |

  

| MEAN ARTERIAL PRESSURE  | PIAC | E100   | E200   |
|-------------------------|------|--------|--------|
| Baseline                | 100  | 99     | 103    |
| Post-induction          | 108  | 86 **  | 88 **  |
| Post-intubation maximum | 122  | 110 ** | 115 *  |
| 0.5 min post-intubation | 114  | 107 ** | 112 *  |
| 1.5 min post-intubation | 109  | 109 ** | 117 ** |
| 2.5 min post-intubation | 105  | 109 *  | 117 *  |
| 3.5 min post-intubation | 117  | 110    | 107    |
| 4.5 min post-intubation | 106  | 96     | 101    |
| 5.5 min post-intubation | 96   | 91     | 96     |

\* p ≤ .05 (compared to placebo)  
\*\* p ≤ .01 (compared to placebo)
